# Supplementary material
Source: PubMed Central journal article supplement (PMC2759151)
Supplement: 10.3163.1536-5050.97.4.015.sg001.pdf [file 10.3163.1536-5050.97.4.015.sg001.pdf]

**The Magnet journey: opportunities for librarians to partner with nurses**

**Margaret (Peg) Allen, MALS, AHIP; Melody M. Allison, MSLIS; Margaret M. Bandy, MALS, AHIP; Joy C. Kennedy, MLS; Pamela Sherwill-Navarro, MLS, AHIP**

**Table 1**

Timeline of Medical Library Association continuing education and section activities related to evidence-based nursing practice and the Magnet Recognition Program

| <b>Date</b> | <b>Title</b>                                               | <b>Details</b>                                                                                                                                                                                                  | <b>Category</b> | <b>Web links</b>                                                                                         |
|-------------|------------------------------------------------------------|-----------------------------------------------------------------------------------------------------------------------------------------------------------------------------------------------------------------|-----------------|----------------------------------------------------------------------------------------------------------|
| 2001–2006   | “Finding the Best Evidence (Answers) to Nursing Questions” | Allen MP: comments on Magnet program impact on library services, New Jersey presentation offered nursing continuing education (CE) units credit                                                                 | MLA CE (N)      | <a href="http://www.healthknowledgeconsultants.net/CE.htm">www.healthknowledgeconsultants.net/CE.htm</a> |
| May 2003    | “Evidence-Based Nursing: Needs, Tools, Solutions”          | MLA annual meeting symposium with MLA and nursing CE, cosponsored by the Nursing and Allied Health Resources Section (NAHRS) and Interagency Council on Information Resources in Nursing (ICIRN), San Diego, CA | MLA CE (N)      | <a href="http://www.nahrs.mlanet.org/resource/symposium/">www.nahrs.mlanet.org/resource/symposium/</a>   |
| 2004        | Symposium follow-up evaluation                             | Allen MP, Jacobs SK, Levy J, Pierce S, Pravikoff DS, Tanner A. Continuing education as a catalyst for inter-professional collaboration. Med Ref Serv Q. 2005 Fall;24(3):93–101                                  | MLA CE (N)      |                                                                                                          |

|                    |                                                                                                            |                                                                                                                                                                                                                                  |                           |                                                                                                                                                              |
|--------------------|------------------------------------------------------------------------------------------------------------|----------------------------------------------------------------------------------------------------------------------------------------------------------------------------------------------------------------------------------|---------------------------|--------------------------------------------------------------------------------------------------------------------------------------------------------------|
| 2005               | “Librarian Roles in Evidence Based Nursing Practice 2005” survey                                           | Allen MP, Sherwill-Navarro P, as research for MLA CE and <i>Journal of the Medical Library Association (JMLA)</i> NAHRS-sponsored article                                                                                        | Survey research           | <a href="http://www.healthknowledgeconsultants.net/Research.htm">www.healthknowledgeconsultants.net/Research.htm</a>                                         |
| March 2005         | ICIRN meeting                                                                                              | American Nurses Credentialing Center (ANCC) Magnet Recognition Program presentation, Silver Spring, MD; noted in ICIRN report to MLA Board; MLA ICIRN representatives: Margaret (Peg) Allen, AHIP, and Susan Kaplan Jacobs, AHIP | Allied organization       | <a href="http://www.mlanet.org/about/annual_report/03_04/allied/icirn.html">www.mlanet.org/about/annual_report/03_04/allied/icirn.html</a>                   |
| May 2006           | “Get Magnetized: Magnet Recognition, Libraries, and Excellence”                                            | Includes ANCC speaker                                                                                                                                                                                                            | Section program           | <a href="http://www.nahrs.mlanet.org/archives/annmtg/2006mtg/2006MagnetProgram.html">www.nahrs.mlanet.org/archives/annmtg/2006mtg/2006MagnetProgram.html</a> |
| May 2006           | “Implementing Evidence-based Practice in the Real World”                                                   | Includes invited paper by nurse evidence-based practice (EBP) author                                                                                                                                                             | Section program           | <a href="http://www.nahrs.mlanet.org/archives/annmtg/2006mtg/2006EBPProgram.html">www.nahrs.mlanet.org/archives/annmtg/2006mtg/2006EBPProgram.html</a>       |
| May 2006, May 2009 | “Evidence-Based Public Health” [nursing]                                                                   | De Groote S, Dorsch J, Baldwin K: presented at MLA '06 and MLA '09                                                                                                                                                               | MLA CE                    | <a href="http://www.cech.mlanet.org">www.cech.mlanet.org</a>                                                                                                 |
| May 2006–2007      | 2006/07 MLA priorities                                                                                     | Shipman J: “aligning our libraries as ‘Forces of Magnetism’ for Magnet hospitals and advocating our expertise to institutional teams seeking Magnet status”                                                                      | MLA presidential priority | <a href="http://www.mlanet.org/about/leaders/president_06-07/jps_prior.html">www.mlanet.org/about/leaders/president_06-07/jps_prior.html</a>                 |
| May 2006–2007      | NAHRS Task Force to Create Standards for Nursing Information Resources and Services in Healthcare Settings | Melody Allison, chair, appoints cochairs Deborah Lauseng and Pamela Sherwill Navarro, AHIP                                                                                                                                       | Section initiative        | <a href="http://www.mlanet.org/about/annual_report/06_07/2006_07_ar_sections.pdf">www.mlanet.org/about/annual_report/06_07/2006_07_ar_sections.pdf</a>       |

|                                       |                                                                                                                                                   |                                                                                                                                                                                                                                |                           |                                                                                                                                                               |
|---------------------------------------|---------------------------------------------------------------------------------------------------------------------------------------------------|--------------------------------------------------------------------------------------------------------------------------------------------------------------------------------------------------------------------------------|---------------------------|---------------------------------------------------------------------------------------------------------------------------------------------------------------|
| October 2006                          | National Magnet Conference in Denver                                                                                                              | Margaret Bandy, AHIP, represents MLA, sponsored by the Hospital Libraries Section (HLS); Nancy Goodwin copresents a paper at that conference with a nurse from her hospital: "PICO's Peak: A Program for Staff Nurse Research" | MLA Board                 | <a href="http://www.hls.mlanet.org/NatNet/issues/v31n3.pdf">www.hls.mlanet.org/NatNet/issues/v31n3.pdf</a>                                                    |
| October 2006, November 2007, May 2008 | "Finding the Evidence: Evidence-based Practice in Nursing"                                                                                        | Judkins DZ, O'Donovan P: New Jersey presentation offered nursing CEU credit                                                                                                                                                    | MLA CE (N)                | <a href="http://www.cech.mlanet.org">www.cech.mlanet.org</a> and <a href="http://www.hslanj.org/finding_evidence.pdf">www.hslanj.org/finding_evidence.pdf</a> |
| November 2006–February 2008           | "Getting Magnetized: Search and Service Strategies for Nursing Excellence"                                                                        | Allen MP: Boston class offered nursing CEUs                                                                                                                                                                                    | MLA CE (N)                | <a href="http://www.healthknowledgeconsultants.net/CE.htm">www.healthknowledgeconsultants.net/CE.htm</a>                                                      |
| 2007                                  | First MLA representative appointed to the ANCC Magnet program                                                                                     | Diane Rourke, AHIP, by Mark E. Funk, AHIP, MLA president; see: Medical Library Association. MLA leaders: MLA representatives to allied organizations [Internet]. Chicago, IL: The Association; 2007. Allison MM, Bandy M       | Allied organization       | <a href="http://www.mlanet.org/about/leaders/allied.html">www.mlanet.org/about/leaders/allied.html</a>                                                        |
| June 2007                             | "Magnet Recognition Program @ Collaboration Proposal: The American Nurses Credentialing Center and the Medical Library Association" [white paper] |                                                                                                                                                                                                                                | MLA white paper           | <a href="http://www.mlanet.org/resources/vital/mlawhitepaper.html">www.mlanet.org/resources/vital/mlawhitepaper.html</a>                                      |
| July 2007                             | "NAHRS 2007 Magnet Coordinator Survey"                                                                                                            | Sherwill-Navarro P, Allen MP: report to MLA Board, Feb and May 2008                                                                                                                                                            | Section research          | <a href="http://www.nahrs.mlanet.org/activity/mapping/research/">www.nahrs.mlanet.org/activity/mapping/research/</a>                                          |
| July 2007–March 2008                  | Correspondence between MLA Executive Director Carla J. Funk, CAE, and ANCC                                                                        | Regarding the proposed revisions to the Magnet Application Manual and the role of librarians in supporting their organization's magnet journey                                                                                 | MLA white paper follow-up |                                                                                                                                                               |

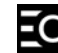

|                 |                                                                                                                      |                                                                                                                                                                                                                                                                             |                         |                                                                                                                                            |
|-----------------|----------------------------------------------------------------------------------------------------------------------|-----------------------------------------------------------------------------------------------------------------------------------------------------------------------------------------------------------------------------------------------------------------------------|-------------------------|--------------------------------------------------------------------------------------------------------------------------------------------|
| Fall 2007       | “Evidence-Based Nursing: A Seminar in Integrating Literature, Clinical Practice, and Patient Education”              | Blake L, Ballance D, Bradford K                                                                                                                                                                                                                                             | MLA CE                  | <a href="http://www.cech.mlanet.org/node/385/">www.cech.mlanet.org/node/385/</a>                                                           |
| October 2007    | “Review for Librarians of Evidence-based Practice in Nursing and the Allied Health Professions in the United States” | Kronenfeld M, Stephenson PL, Nail-Chiwetalu B, Tweed EM, Sauers EL, McLeod TC, Guo R, Trahan H, Alpi KM, Hill B, Sherwill-Navarro P, Allen MP, Stephenson PL, Hartman LM, Burnham J, Fell D, Pavlick R, MacNaughton E, Ratner NB. J Med Libr Assoc. 2007 Oct;95(4):394–407. | NAHRS-sponsored article | <a href="http://www.pubmedcentral.nih.gov/articlerender.fcgi?artid=2000778">www.pubmedcentral.nih.gov/articlerender.fcgi?artid=2000778</a> |
| November 2007   | “Don’t Fence Me In: An Exploration of Barriers to Nurses Using the Library for Research”                             | Davidson C, Wright L, France N                                                                                                                                                                                                                                              | MLA CE                  | <a href="http://www.cech.mlanet.org">www.cech.mlanet.org</a>                                                                               |
| March 2008      | “Introduction to Evidence based Practice in a Magnetic World”                                                        | Yancey T, Snow-Croft S: in-person or web-based learning via National Network of Libraries of Medicine Moodle                                                                                                                                                                | MLA CE                  | <a href="http://www.cech.mlanet.org">www.cech.mlanet.org</a>                                                                               |
| May 2008        | “Connecting Libraries, Nurses, and Accreditation/Credentialing Organizations to Improve Patient Care”                | Sponsored by Hospital Libraries Section and NAHRS, includes papers on MLA white paper, NAHRS surveys, and a play promoting importance of evidence-based nursing (EBN)                                                                                                       | Section program         | <a href="http://www.nahrs.mlanet.org/archives/annmtg/2008mtg/">www.nahrs.mlanet.org/archives/annmtg/2008mtg/</a>                           |
| 2008–2009       | NAHRS Standards Committee                                                                                            | David Nolfi, AHIP, chair, appoints first coauthors Joy Kennedy and Paul Blobaum                                                                                                                                                                                             | Section committee       | <a href="http://www.nahrs.mlanet.org/sectorg/officers.html">www.nahrs.mlanet.org/sectorg/officers.html</a>                                 |
| April–June 2008 | “Role of the Librarian in Evidence Based Nursing” survey                                                             | Sherwill-Navarro P, Allen MP: report presented at Southern Chapter Meeting, October 2008: Evidence based nursing practice: is there a role for librarians? summary of survey results posted to NAHRS website                                                                | NAHRS research          | <a href="http://www.nahrs.mlanet.org/activity/mapping/research/">www.nahrs.mlanet.org/activity/mapping/research/</a>                       |

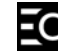

|                         |                                                                                                         |                                                                                       |                         |                                                                                                                                                                                                    |
|-------------------------|---------------------------------------------------------------------------------------------------------|---------------------------------------------------------------------------------------|-------------------------|----------------------------------------------------------------------------------------------------------------------------------------------------------------------------------------------------|
| October 2008            | “Next Stop in the Magnet Journey: The Hospital Library”                                                 | Rourke D: presented at ANCC Magnet Summit, Salt Lake City, UT                         | Allied organization (N) | <a href="http://www.nursinglibrary.org/Portal/Main.aspx?pageid=4024&amp;PID=21340">www.nursinglibrary.org/Portal/Main.aspx?pageid=4024&amp;PID=21340</a>                                           |
| October 2008, May 2009– | “Getting Magnetized: Search and Service Strategies for Nursing Excellence”                              | Kennedy J, Allen MP, May 2009 to date: web-based learning via MLA Moodle              | MLA CE                  | <a href="http://www.cech.mlanet.org/node/81/">www.cech.mlanet.org/node/81/</a> , archive: <a href="http://www.healthknowledgeconsultants.net/CE.htm">www.healthknowledgeconsultants.net/CE.htm</a> |
| Nov 2008–               | “EBP for Nursing Librarians”                                                                            | Batten J                                                                              | MLA CE                  | <a href="http://www.cech.mlanet.org/node/375/">www.cech.mlanet.org/node/375/</a>                                                                                                                   |
| March 2009              | “Evidence-Based Nursing: A Seminar in Integrating Literature, Clinical Practice, and Patient Education” | Blake L, Ballance D, Bradford K                                                       | MLA CE                  | <a href="http://www.cech.mlanet.org/node/385/">www.cech.mlanet.org/node/385/</a>                                                                                                                   |
| May 2009                | “Magnet Hospital Designation: The Integral Role of the Medical Librarian”                               | Jones S, Suttles C                                                                    | MLA CE                  | <a href="http://www.cech.mlanet.org/node/321/">www.cech.mlanet.org/node/321/</a>                                                                                                                   |
| May 2009                | “Magnet Fusion: (Re)credentialing from a Leadership Perspective”                                        | MLA '09: nurse speaker                                                                | Section program         | <a href="http://www.nahrs.mlanet.org">www.nahrs.mlanet.org</a>                                                                                                                                     |
| July 2009–              | “Expert Searching for Evidence Based Nursing”                                                           | Allen P, Sherwill-Navarro P: plan to investigate possibility for nursing CEUs in 2010 | MLA CE                  | <a href="http://www.cech.mlanet.org/">www.cech.mlanet.org/</a> , archive: <a href="http://www.healthknowledgeconsultants.net/CE.htm">www.healthknowledgeconsultants.net/CE.htm</a>                 |
